# Supplementary material for: ZEB1-associated drug resistance in cancer cells is reversed by the class I HDAC inhibitor mocetinostat
Source: PubMed Central journal article supplement (PMC4459821; doi:10.15252/emmm.201404396), 2015-04-14
Supplement: emmm0007-0831-sd1.pdf [file emmm0007-0831-sd1.pdf]

## **Supplementary Information**

### **ZEB1-associated drug resistance in cancer cells is reversed by the class I**

#### **HDAC-inhibitor mocetinostat**

Simone Meidhof<sup>\*,1,2,3</sup> , Simone Brabletz<sup>\*4</sup> , Waltraut Lehmann<sup>1,3</sup>, Bogdan-Tiberius Preca<sup>1,3</sup>, Kerstin Mock<sup>1,3</sup>, Manuel Ruh<sup>4</sup>, Julia Schüler<sup>5</sup>, Maria Berthold<sup>1</sup>, Anika Weber<sup>1</sup>, Ulrike Burk<sup>1</sup>, Michael Lübbert<sup>6,10</sup>, Martin Pühr<sup>7</sup>, Zoran Culig<sup>7</sup>, Ulrich Wellner<sup>8</sup>, Tobias Keck<sup>8</sup>, Peter Bronsert<sup>9</sup>, Simon Küsters<sup>1</sup>, Ulrich T. Hopt<sup>1</sup>, Marc P. Stemmler<sup>4</sup>, Thomas Brabletz<sup>4,10</sup>

#### **Table of Contents**

**Supplementary Figure Legends**

**Supplementary Figures S1 – S4**

**Supplementary Tables S1 – S4**

## Supplementary Figure Legends

### Figure S1. miR-203 restores drug sensitivity.

(A,B) Stable overexpression of miR-200c and miR-203 in MiaPaCa (A) induces sensitivity to gemcitabine treatment (50nM, 72hrs). In MDA-MB-231 (B), only miR-203 significantly increases sensitivity to paclitaxel at high doses as measured by MTT assay. Overexpression of miR-203 sensitizes MiaPaCa to gemcitabine-triggered (50nM, 48hrs) and MDA to paclitaxel-triggered (5nM, 48hrs) apoptosis as evaluated by cleaved caspase-3 detection in western blot and immunofluorescence. Scale bar 20  $\mu$ m. n=3, mean  $\pm$  SEM, Dunnett's multiple comparisons test (p-values in the graphs are: \*p=0.01-0.05, \*\*p= 0.001-0.01, \*\*\*p<0.001, \*\*\*\*p<0.0001; for exact p-values see Table S4).

(C) BrdU incorporation shows enhanced proliferation of miR-203 overexpressing cells. In contrast, miR-203 strongly reduced proliferation in Panc1 and weakly in hPaca1 if combined with gemcitabine treatment (72hrs). n=3, mean  $\pm$  SEM, Dunnett's multiple comparisons test.

### Figure S2. Characterisation of patient derived pancreatic cancer cells and effect of epigenetic drugs on microRNA expression.

(A) Immunofluorescence and qRT-PCR showing that the differentiated cell line hPaca2 has an epithelial phenotype, similar to BxPC3, whereas the undifferentiated cell line hPaca1 shows an EMT-phenotype, resembling the cell line Panc1. n=3, mean  $\pm$  SEM. Scale bar 20  $\mu$ m. (B) The undifferentiated cell line hPaca1, like Panc1, has a CD24+/CD44+ cancer stem cell population. In the differentiated line hPaca2, like in BxPC3, no such population was observed. Dotted lines were added to provide spatial orientation. (C) hPaca1 and hPaca2 show similar, but slightly different susceptibilities to gemcitabine and mocetinostat in MTT assays. n=3, mean  $\pm$  SEM. (D) Relative expression levels of indicated genes in Panc1 for all indicated drugs tested. (E) Relative expression levels (left panel) in hPaca1 for all drugs and magnification for the effects of the HDACis (right panel). (F) Relative expression levels in MDA-MB-231 for treatment with HDACis. (D-F) n= 3, mean  $\pm$  SEM, unpaired Student's t- test, for detailed analyses of significance see Table S1.

### Figure S3. Mocetinostat reduces ZEB1 expression in undifferentiated cancer cells.

(A) Western blot and immunofluorescence showing downregulation of ZEB1 and upregulation of acetylated histone 3 and E-cadherin after mocetinostat treatment (1 $\mu$ M, 48hrs) in the undifferentiated cancer cell lines MDA-MB-231 and hPaca1. No change in ZEB1 and E-cadherin expression is seen in the more differentiated patient-derived line hPaca2. Scale bar 20  $\mu$ m. (B) Chromatin immunoprecipitation analysis shows mocetinostat-induced (1 $\mu$ M, 48hrs)

enrichment of the active histone marks H3K4me3, H3ac and H3K9ac at ZEB1 target gene loci in MDA-MB-231.  $n=3$ , mean  $\pm$  SEM, unpaired Student's t- test. Indicated are only significant differences with  $*p=0.01-0.05$ ,  $**p=0.001-0.01$ ,  $***p<0.001$ . **(C)** Cancer stem cell sphere assay showing reduced sphere-forming capacity of hPaca1 when pre-treated with mocetinostat for 48hrs.  $n=3$ , mean  $\pm$  SEM.  $***p<0.001$ , Mann-Whitney-U test. **(D)** MTT assay showing an increase of relative MTT-activity in Panc1 cells after treatment with antagomirs against miR-203 and all miR-200 family members (a-mix) compared to controls and antagomir against miR-203 alone. This effect was seen in combination of mocetinostat and gemcitabine (Mo plus G) treated cells, but also in cells treated with gemcitabine alone.  $n=3$ , mean  $\pm$  SEM, Dunnett's multiple comparisons test.

**Figure S4. Mocetinostat sensitizes to gemcitabine *in vivo*.**

**(A)** Relative tumor volume (RTV) in NMRI nu/nu mice with hPaca1 tumors. 18 days after implantation, mice were randomized according to tumor volume. Treatment (day 0) with mocetinostat (60 or 90 mg/kg/day) and gemcitabine (120 mg/kg/day; once a week) was implemented as depicted in the scheme. Shown are the group medians of the RTVs over time (left) and the individual RTVs on day 10 (right).  $n=5$  for each treatment group.  $*p=0.01-0.05$ ,  $**p=0.001-0.01$ , nonparametric Mann-Whitney-U test. **(B)** Immunohistochemistry of serial sections showing reduced ZEB1 and increased E-cadherin in hPaca1-derived tumors of mice treated with mocetinostat. Scale bar 50  $\mu\text{m}$ , inserts for higher magnifications 20  $\mu\text{m}$ . **(C)** *In situ* hybridisation (isH) for miR-203 and control probe shows gain of miR-203 and associated loss of ZEB1 detected by immunohistochemistry in serial sections of mocetinostat treated hPaca1-derived tumors. Scale bar 50  $\mu\text{m}$ , inserts for higher magnifications 15  $\mu\text{m}$ . **(D)** Relative tumor volume (RTV) in NMRI nu/nu mice with hPaca2-derived tumors. 10 days after implantation, mice were randomized according to tumor volume and treatment with mocetinostat (60 mg/kg/day) and gemcitabine (25 mg/kg/day; twice a week) was implemented as depicted in the scheme. Shown are the group medians of the RTVs over time (left) and the individual RTVs on day 32 (right).  $n=5$  for each treatment group.  $*p=0.01-0.05$ , nonparametric Mann-Whitney-U test. **(E)** Immunohistochemistry of serial sections showing no change in ZEB1 and E-cadherin expression in hPaca2-derived tumors of mice treated with mocetinostat. Scale bar 50  $\mu\text{m}$ , inserts for higher magnifications 20  $\mu\text{m}$ .

**A**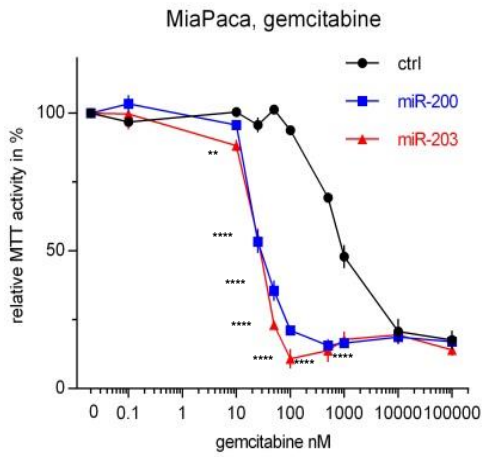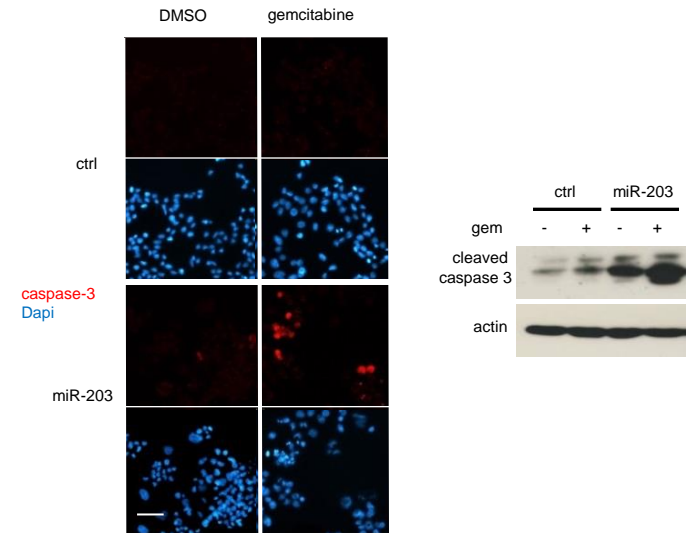**B**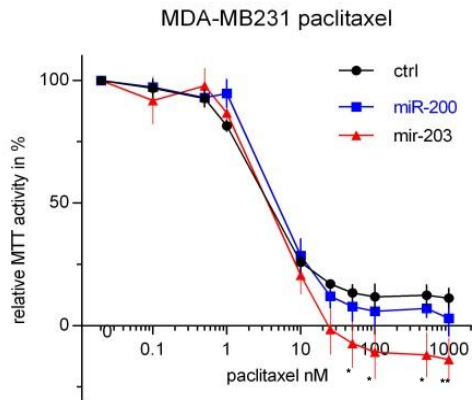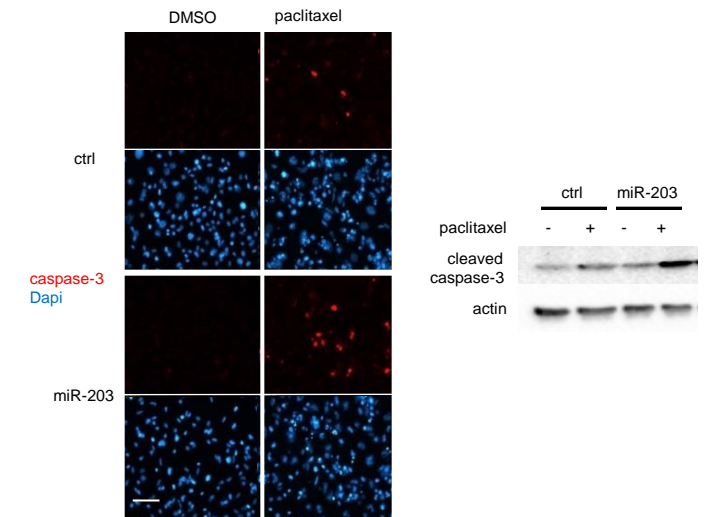**C**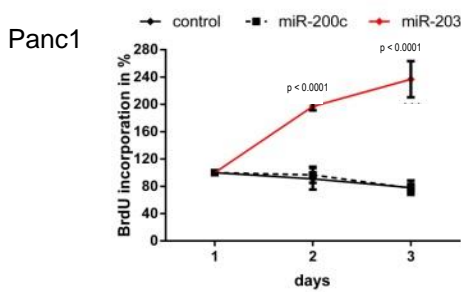

hPaca1

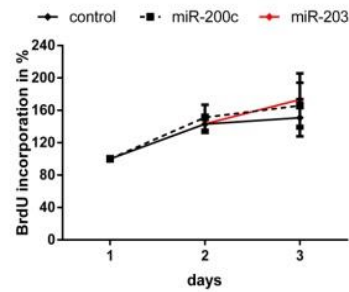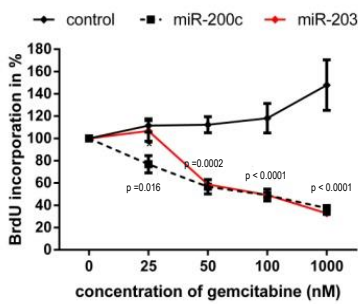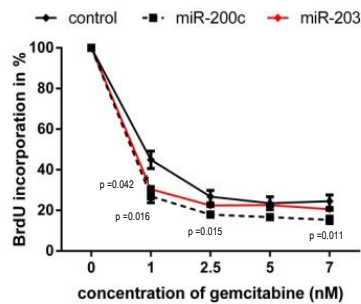

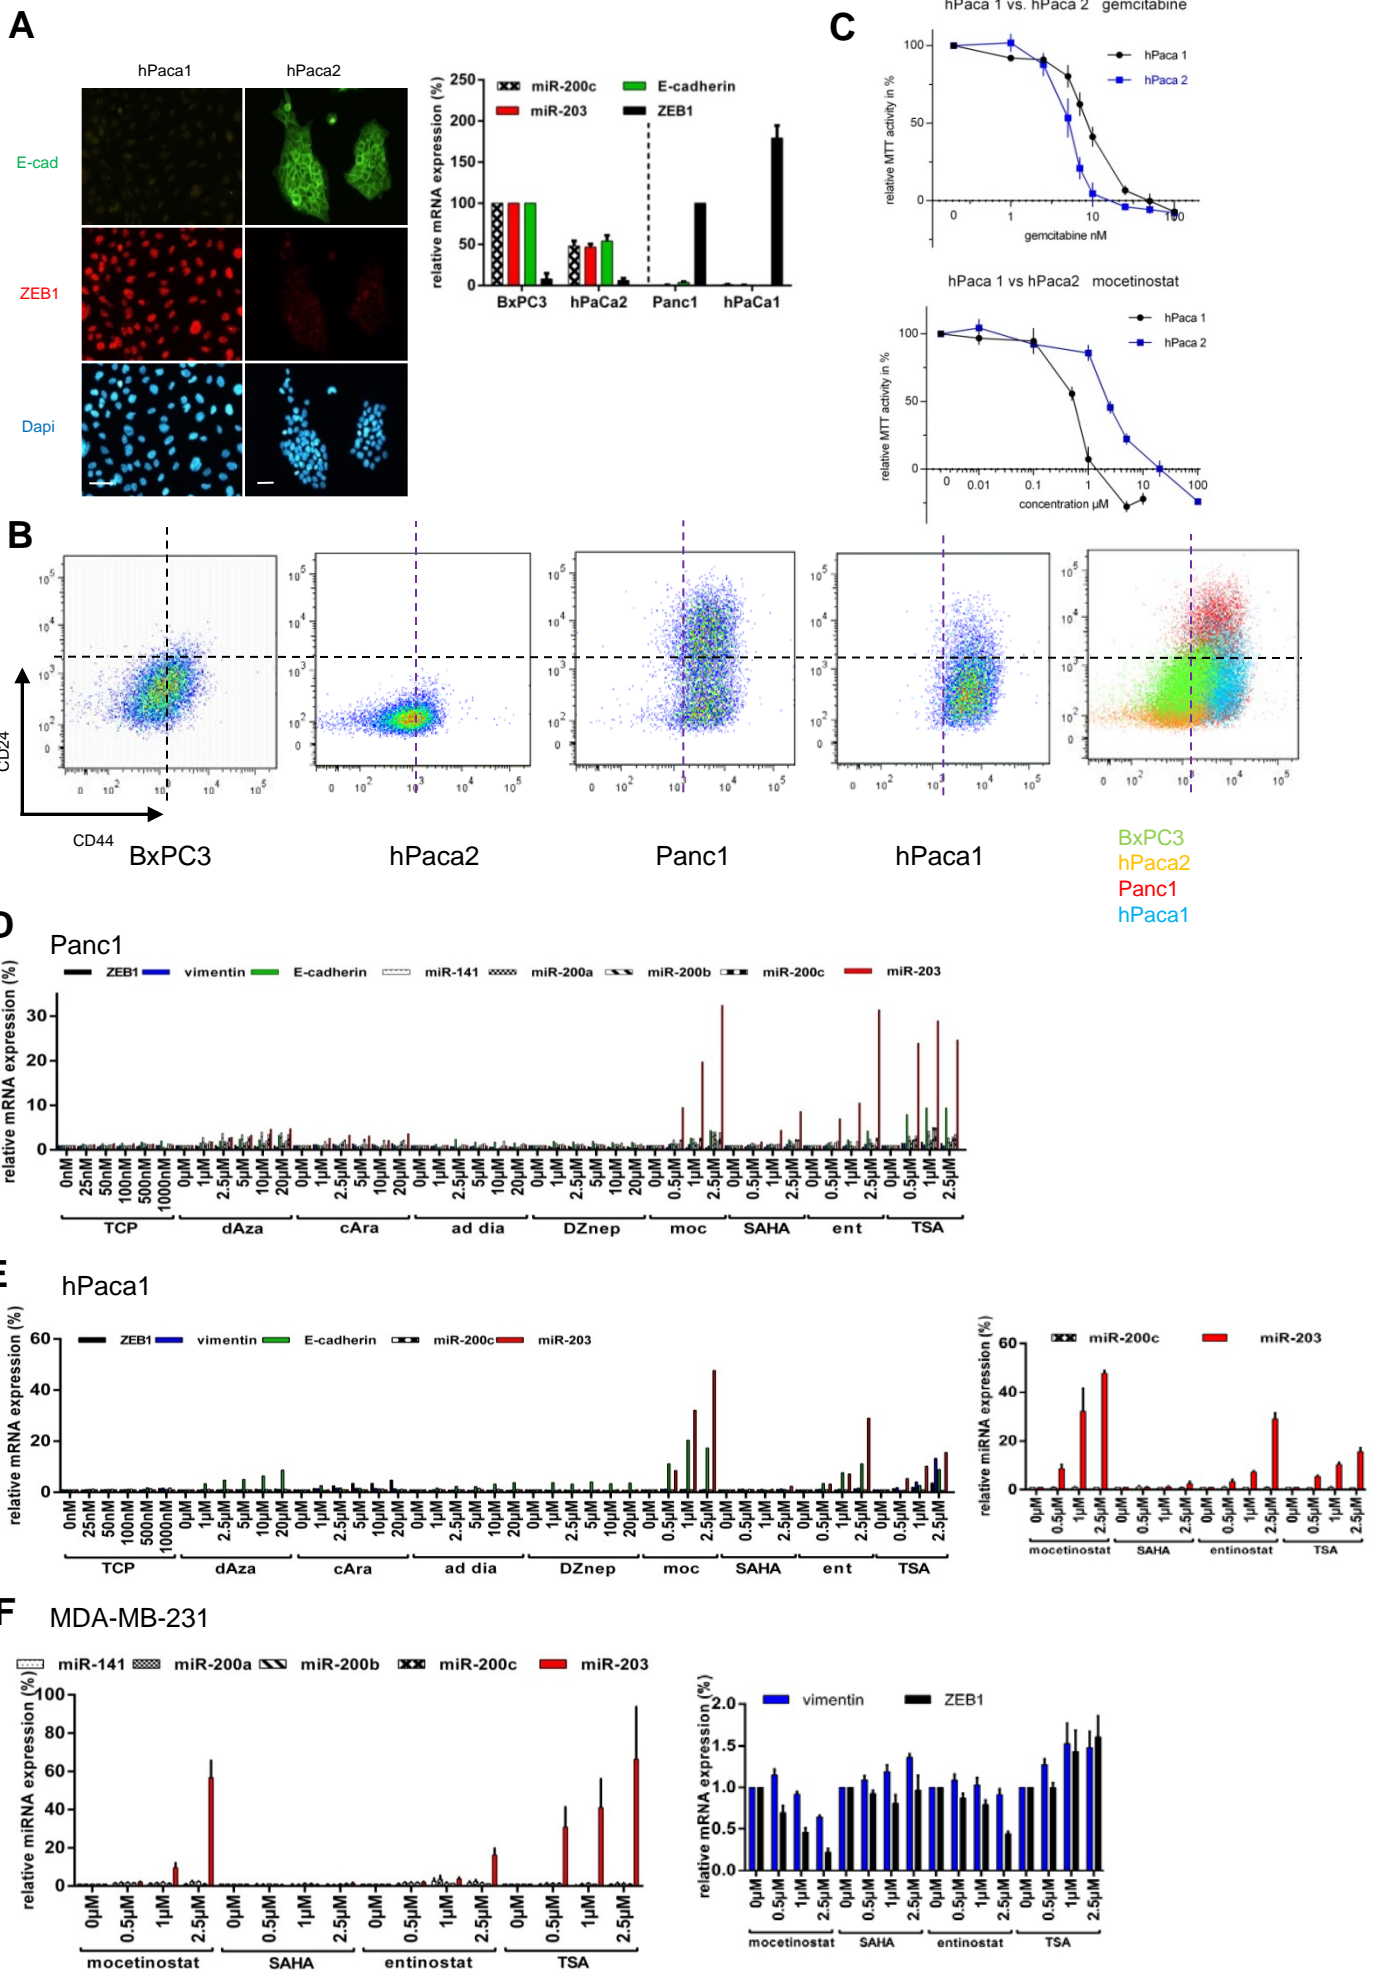

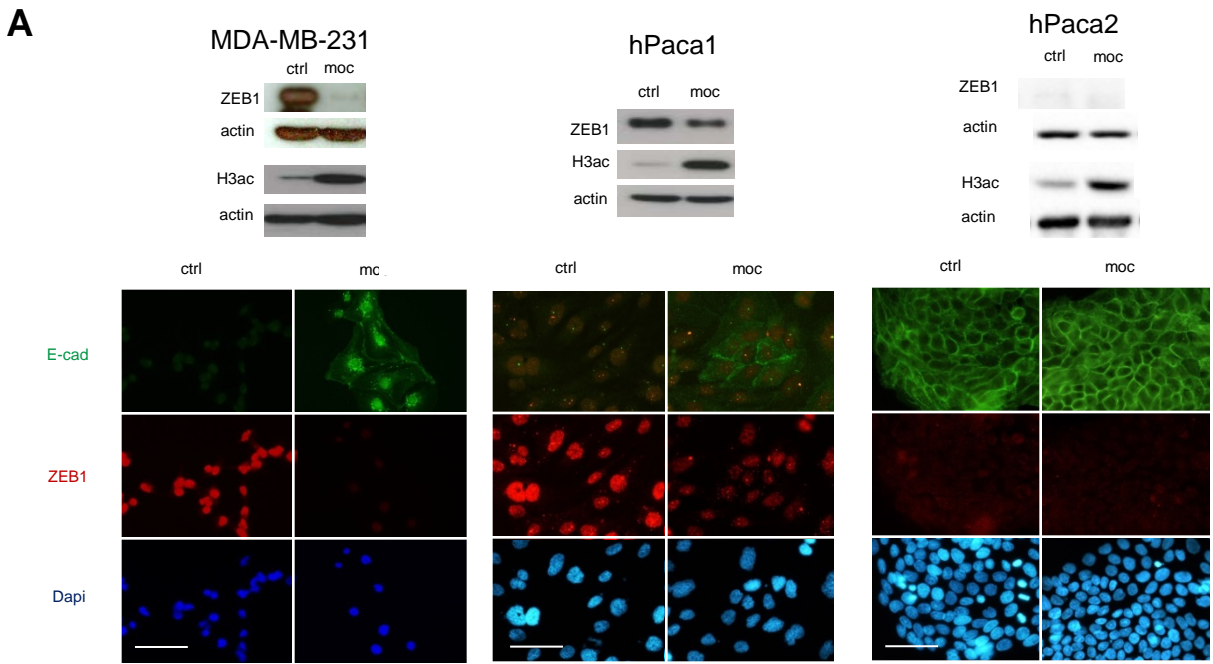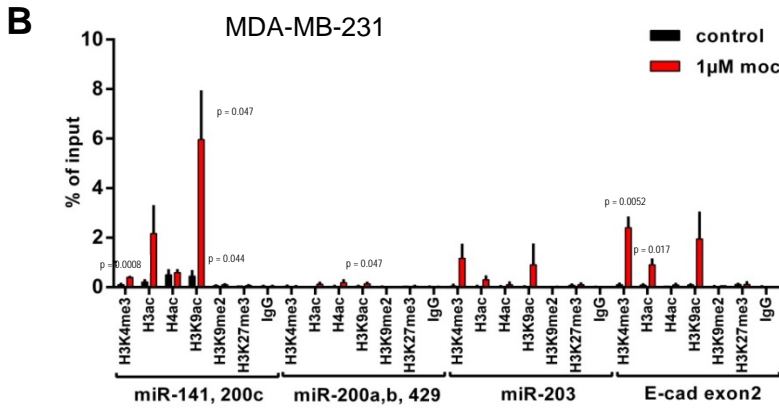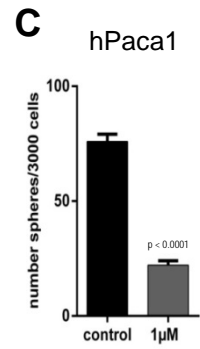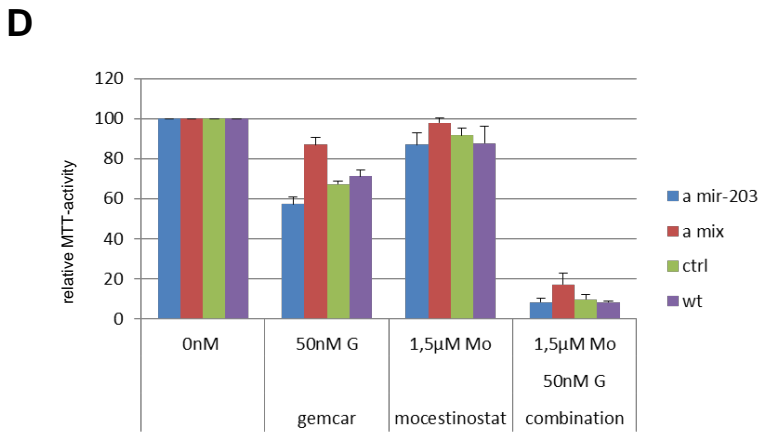

### A hPaca1

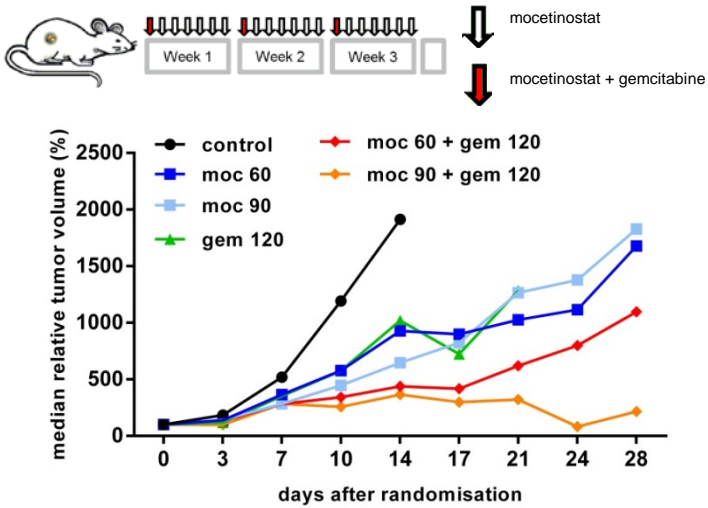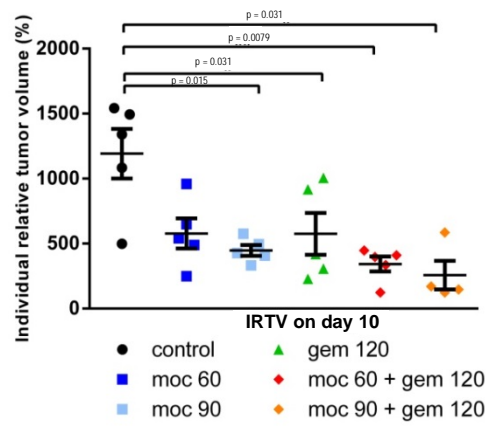

### B hPaca1

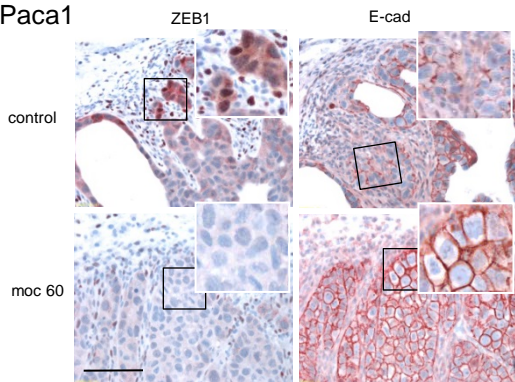

### C

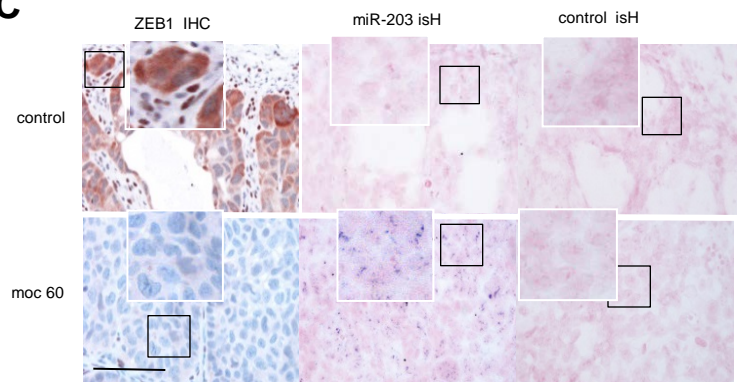

### D hPaca2

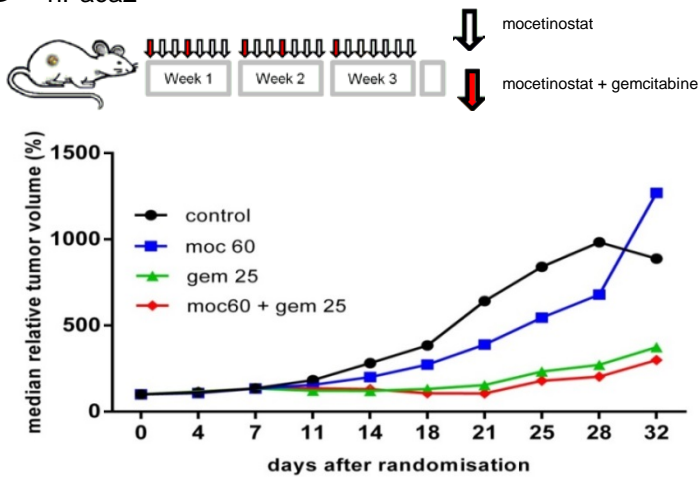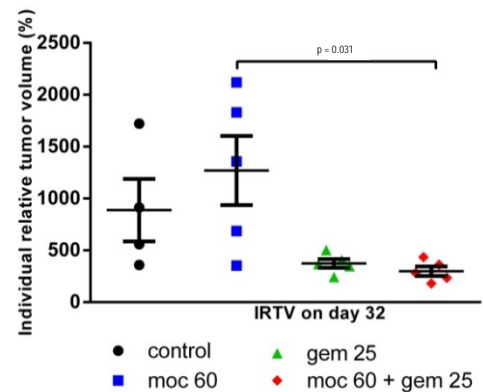

### E hPaca2

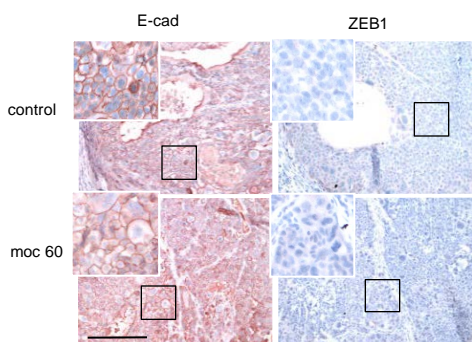

## Supplementary Tables

**Table S1. Statistics to the drug screens in Fig. 2 A,B and Fig. S2 D-F.**

|                                                           |              |                          |                          | significance           | P value     |             |            |
|-----------------------------------------------------------|--------------|--------------------------|--------------------------|------------------------|-------------|-------------|------------|
| <b>Panc1</b><br>to Fig. 2<br>A,B and<br>suppl Fig.<br>2 D | Mocetinostat | 0 $\mu$ M vs 0.5 $\mu$ M | miR-141                  | *                      | 0.0101472   |             |            |
|                                                           |              |                          | miR-200a                 | *                      | 0.00178797  |             |            |
|                                                           |              |                          | miR-200b                 | *                      | 0.0192398   |             |            |
|                                                           |              |                          | miR-200c                 | *                      | 0.000296977 |             |            |
|                                                           |              |                          | miR-203                  | *                      | 0.00177692  |             |            |
|                                                           |              |                          |                          |                        |             |             |            |
|                                                           |              |                          | 0 $\mu$ M vs 1 $\mu$ M   | miR-141                |             | 0.0904472   |            |
|                                                           |              |                          |                          | miR-200a               |             | 0.169698    |            |
|                                                           |              |                          |                          | miR-200b               | *           | 0.0275343   |            |
|                                                           |              |                          |                          | miR-200c               | *           | 7.23038E-05 |            |
|                                                           |              |                          |                          | miR-203                | *           | 0.00657138  |            |
|                                                           |              |                          | 0 $\mu$ M vs 2.5 $\mu$ M | miR-141                | *           | 0.00501117  |            |
|                                                           |              |                          |                          | miR-200a               | *           | 0.00307866  |            |
|                                                           |              |                          |                          | miR-200b               | *           | 0.000226343 |            |
|                                                           |              |                          |                          | miR-200c               | *           | 0.000763524 |            |
|                                                           |              |                          |                          | miR-203                | *           | 0.000886167 |            |
|                                                           |              | SAHA                     | 0 $\mu$ M vs 0.5 $\mu$ M | miR-141                | *           | 0.00685916  |            |
|                                                           |              |                          |                          | miR-200a               | *           | 0.00796948  |            |
|                                                           |              |                          |                          | miR-200b               |             | 0.927451    |            |
|                                                           |              |                          |                          | miR-200c               |             | 0.620388    |            |
|                                                           |              |                          |                          | miR-203                |             | 0.313761    |            |
|                                                           |              |                          |                          |                        |             |             |            |
|                                                           |              |                          |                          | 0 $\mu$ M vs 1 $\mu$ M | miR-141     | *           | 0.00398095 |
|                                                           |              |                          |                          |                        | miR-200a    | *           | 0.0312312  |
|                                                           |              |                          |                          | miR-200b               |             | 0.408944    |            |
|                                                           |              |                          |                          | miR-200c               |             | 0.408467    |            |
|                                                           |              |                          |                          | miR-203                |             | 0.159719    |            |
|                                                           |              |                          | 0 $\mu$ M vs 2.5 $\mu$ M | miR-141                | *           | 0.00169659  |            |
|                                                           |              |                          |                          | miR-200a               | *           | 0.0197391   |            |
|                                                           |              |                          |                          | miR-200b               |             | 0.08615     |            |
|                                                           |              |                          |                          | miR-200c               |             | 0.294927    |            |
|                                                           |              |                          |                          | miR-203                |             | 0.0523112   |            |
|                                                           | Entinostat   |                          | 0 $\mu$ M vs 0.5 $\mu$ M | miR-141                |             | 0.0524772   |            |
|                                                           |              |                          |                          | miR-200a               |             | 0.101803    |            |
|                                                           |              | miR-200b                 |                          |                        | 0.229399    |             |            |
|                                                           |              | miR-200c                 |                          | *                      | 0.000705014 |             |            |
|                                                           |              | miR-203                  |                          | *                      | 0.0309337   |             |            |
|                                                           |              |                          |                          |                        |             |             |            |
|                                                           |              |                          | 0 $\mu$ M vs 1 $\mu$ M   | miR-141                |             | 0.0619428   |            |
|                                                           |              |                          |                          | miR-200a               |             | 0.761706    |            |
|                                                           |              |                          |                          | miR-200b               |             | 0.339964    |            |
|                                                           |              |                          |                          | miR-200c               | *           | 0.00906543  |            |
|                                                           |              |                          |                          | miR-203                | *           | 0.0311997   |            |
|                                                           |              |                          | 0 $\mu$ M vs 2.5 $\mu$ M | miR-141                | *           | 0.0110309   |            |
|                                                           |              |                          | miR-200a                 |                        | 0.144303    |             |            |
|                                                           |              |                          | miR-200b                 |                        | 0.37936     |             |            |
|                                                           |              |                          | miR-200c                 | *                      | 2.48221E-05 |             |            |



|  |      |               |          |   |             |
|--|------|---------------|----------|---|-------------|
|  |      |               | miR-203  | * | 0.00183598  |
|  | TSA  | 0μM vs 0.5μM  | miR-141  | * | 0.0242689   |
|  |      |               | miR-200a |   | 0.0574231   |
|  |      |               | miR-200b | * | 0.0179132   |
|  |      |               | miR-200c | * | 0.00573301  |
|  |      |               | miR-203  | * | 0.00588348  |
|  |      | 0μM vs 1μM    | miR-141  |   | 0.296637    |
|  |      |               | miR-200a |   | 0.232213    |
|  |      |               | miR-200b |   | 0.237649    |
|  |      |               | miR-200c | * | 0.0125326   |
|  |      |               | miR-203  | * | 0.0314868   |
|  |      | 0μM vs 2.5μM  | miR-141  |   | 0.217921    |
|  |      |               | miR-200a | * | 0.0408224   |
|  |      |               | miR-200b |   | 0.0523826   |
|  |      |               | miR-200c | * | 0.0070874   |
|  |      |               | miR-203  | * | 0.00959804  |
|  | TCP  | 0nM vs 25nM   | miR-141  |   | 0.398226    |
|  |      |               | miR-200a |   | 0.813579    |
|  |      |               | miR-200b | * | 2.39516E-05 |
|  |      |               | miR-200c | * | 0.00169085  |
|  |      |               | miR-203  | * | 0.0214136   |
|  |      | 0nM vs 50nM   | miR-141  |   | 0.910641    |
|  |      |               | miR-200a |   | 0.865217    |
|  |      |               | miR-200b |   | 0.0889865   |
|  |      |               | miR-200c |   | 0.316396    |
|  |      |               | miR-203  |   | 0.243373    |
|  |      | 0nM vs 100nM  | miR-141  |   | 0.941126    |
|  |      |               | miR-200a |   | 0.791931    |
|  |      |               | miR-200b |   | 0.771651    |
|  |      |               | miR-200c |   | 0.891784    |
|  |      |               | miR-203  | * | 0.0310799   |
|  |      | 0nM vs 500nM  | miR-141  |   | 0.509422    |
|  |      |               | miR-200a |   | 0.722912    |
|  |      |               | miR-200b | * | 0.000100154 |
|  |      |               | miR-200c |   | 0.319105    |
|  |      |               | miR-203  | * | 0.00240042  |
|  |      | 0nM vs 1000nM | miR-141  | * | 0.00148633  |
|  |      |               | miR-200a | * | 0.00535623  |
|  |      |               | miR-200b |   | 0.10761     |
|  |      |               | miR-200c |   | 0.157046    |
|  |      |               | miR-203  |   | 0.4663      |
|  | dAza | 0μM vs 1μM    | miR-141  | * | 0.00337048  |
|  |      |               | miR-200a | * | 0.0384273   |
|  |      |               | miR-200b | * | 0.000772014 |
|  |      |               | miR-200c | * | 0.0245871   |
|  |      |               | miR-203  |   | 0.150975    |
|  |      | 0μM vs 2.5μM  | miR-141  | * | 0.0423177   |
|  |      |               | miR-200a |   | 0.149949    |
|  |      |               | miR-200b |   | 0.100686    |
|  |      |               | miR-200c | * | 0.0185476   |
|  |      |               | miR-203  | * | 0.0367578   |
|  |      | 0μM vs 5μM    | miR-141  | * | 0.0189602   |
|  |      |               | miR-200a | * | 0.0383052   |

|  |        |              |          |   |             |
|--|--------|--------------|----------|---|-------------|
|  |        |              | miR-200b | * | 0.0396054   |
|  |        |              | miR-200c | * | 0.0159626   |
|  |        |              | miR-203  | * | 0.00652072  |
|  |        | 0μM vs 10μM  | miR-141  | * | 0.00271638  |
|  |        |              | miR-200a |   | 0.0705231   |
|  |        |              | miR-200b |   | 0.102657    |
|  |        |              | miR-200c | * | 0.00492039  |
|  |        |              | miR-203  | * | 0.0132818   |
|  |        | 0μM vs 20μM  | miR-141  |   | 0.05638     |
|  |        |              | miR-200a |   | 0.11147     |
|  |        |              | miR-200b |   | 0.0755656   |
|  |        |              | miR-200c | * | 0.00146715  |
|  |        |              | miR-203  | * | 5.9117E-05  |
|  | cAra   | 0μM vs 1μM   | miR-141  |   | 0.756254    |
|  |        |              | miR-200a |   | 0.874297    |
|  |        |              | miR-200b | * | 0.0435609   |
|  |        |              | miR-200c |   | 0.118404    |
|  |        |              | miR-203  | * | 0.0373731   |
|  |        | 0μM vs 2.5μM | miR-141  |   | 0.44783     |
|  |        |              | miR-200a |   | 0.334982    |
|  |        |              | miR-200b | * | 0.000639399 |
|  |        |              | miR-200c |   | 0.109202    |
|  |        |              | miR-203  |   | 0.0735663   |
|  |        | 0μM vs 5μM   | miR-141  |   | 0.710916    |
|  |        |              | miR-200a |   | 0.636781    |
|  |        |              | miR-200b | * | 0.000308005 |
|  |        |              | miR-200c | * | 0.0292408   |
|  |        |              | miR-203  | * | 0.00958409  |
|  |        | 0μM vs 10μM  | miR-141  |   | 0.415608    |
|  |        |              | miR-200a |   | 0.957821    |
|  |        |              | miR-200b | * | 1.63546E-05 |
|  |        |              | miR-200c |   | 0.17101     |
|  |        |              | miR-203  |   | 0.318972    |
|  |        | 0μM vs 20μM  | miR-141  |   | 0.880276    |
|  |        |              | miR-200a |   | 0.235791    |
|  |        |              | miR-200b | * | 0.0292875   |
|  |        |              | miR-200c |   | 0.231039    |
|  |        |              | miR-203  |   | 0.0763708   |
|  | ad dia | 0μM vs 1μM   | miR-141  |   | 0.11692     |
|  |        |              | miR-200a |   | 0.405597    |
|  |        |              | miR-200b |   | 0.97796     |
|  |        |              | miR-200c |   | 0.681376    |
|  |        |              | miR-203  |   | 0.892451    |
|  |        | 0μM vs 2.5μM | miR-141  | * | 0.0100483   |
|  |        |              | miR-200a |   | 0.54253     |
|  |        |              | miR-200b |   | 0.139173    |
|  |        |              | miR-200c | * | 0.0120456   |
|  |        |              | miR-203  |   | 0.960664    |
|  |        | 0μM vs 5μM   | miR-141  |   | 0.14102     |
|  |        |              | miR-200a | * | 0.00490898  |
|  |        |              | miR-200b |   | 0.426241    |
|  |        |              | miR-200c | * | 0.0335828   |
|  |        |              | miR-203  |   | 0.228684    |

|  |              |              |            |   |             |
|--|--------------|--------------|------------|---|-------------|
|  |              | 0µM vs 10µM  | miR-141    | * | 4.80373E-05 |
|  |              |              | miR-200a   |   | 0.109981    |
|  |              |              | miR-200b   |   | 0.540626    |
|  |              |              | miR-200c   |   | 0.162942    |
|  |              |              | miR-203    |   | 0.449171    |
|  |              | 0µM vs 20µM  | miR-141    |   | 0.288932    |
|  |              |              | miR-200a   |   | 0.385234    |
|  |              |              | miR-200b   |   | 0.161664    |
|  |              |              | miR-200c   | * | 0.0114124   |
|  |              |              | miR-203    |   | 0.700658    |
|  | Dznep        | 0µM vs 1µM   | miR-141    |   | 0.491021    |
|  |              |              | miR-200a   |   | 0.191658    |
|  |              |              | miR-200b   |   | 0.275624    |
|  |              |              | miR-200c   |   | 0.241271    |
|  |              |              | miR-203    |   | 0.671703    |
|  |              | 0µM vs 2.5µM | miR-141    | * | 0.00522901  |
|  |              |              | miR-200a   | * | 1.7797E-08  |
|  |              |              | miR-200b   |   | 0.583957    |
|  |              |              | miR-200c   |   | 0.190416    |
|  |              |              | miR-203    | * | 0.0121261   |
|  |              | 0µM vs 5µM   | miR-141    |   | 0.25594     |
|  |              |              | miR-200a   | * | 0.000724519 |
|  |              |              | miR-200b   |   | 0.670705    |
|  |              |              | miR-200c   |   | 0.451233    |
|  |              |              | miR-203    |   | 0.840981    |
|  |              | 0µM vs 10µM  | miR-141    |   |             |
|  |              |              | miR-200a   |   |             |
|  |              |              | miR-200b   |   |             |
|  |              |              | miR-200c   |   | 0.204622    |
|  |              |              | miR-203    |   | 0.192553    |
|  |              | 0µM vs 20µM  | miR-141    |   | 0.0536515   |
|  |              |              | miR-200a   |   | 0.95336     |
|  |              |              | miR-200b   | * | 0.0172065   |
|  |              |              | miR-200c   | * | 0.0171137   |
|  |              |              | miR-203    |   | 0.0524531   |
|  | Mocetinostat | 0µM vs 0.5µM | E-cadherin | * | 0.00695611  |
|  |              |              | ZEB1       | * | 4.40891E-05 |
|  |              | 0µM vs 1µM   | E-cadherin | * | 0.000297856 |
|  |              |              | ZEB1       | * | 3.72811E-05 |
|  |              | 0µM vs 2.5µM | E-cadherin | * | 1.73154E-05 |
|  |              |              | ZEB1       | * | 2.46651E-05 |
|  | SAHA         | 0µM vs 0.5µM | E-cadherin |   | 0.126415    |
|  |              |              | ZEB1       | * | 0.0272728   |
|  |              | 0µM vs 1µM   | E-cadherin |   | 0.353085    |
|  |              |              | ZEB1       | * | 0.000117849 |
|  |              | 0µM vs 2.5µM | E-cadherin |   | 0.277507    |
|  |              |              | ZEB1       | * | 0.00126674  |
|  | Entinostat   | 0µM vs 0.5µM | E-cadherin |   | 0.0732973   |
|  |              |              | ZEB1       | * | 0.00766255  |
|  |              | 0µM vs 1µM   | E-cadherin | * | 0.00528906  |
|  |              |              | ZEB1       | * | 0.00384373  |
|  |              | 0µM vs 2.5µM | E-cadherin | * | 0.00427483  |
|  |              |              | ZEB1       | * | 6.52404E-06 |

|  |        |               |            |   |             |
|--|--------|---------------|------------|---|-------------|
|  | TSA    | 0µM vs 0.5µM  | E-cadherin | * | 0.00312549  |
|  |        |               | ZEB1       | * | 0.0132146   |
|  |        | 0µM vs 1µM    | E-cadherin | * | 0.00337924  |
|  |        |               | ZEB1       |   | 0.0811354   |
|  |        | 0µM vs 2.5µM  | E-cadherin | * | 0.00475107  |
|  |        |               | ZEB1       |   | 0.103332    |
|  | TCP    | 0nM vs 25nM   | E-cadherin |   | 0.340314    |
|  |        |               | ZEB1       |   | 0.0910166   |
|  |        | 0nM vs 50nM   | E-cadherin |   | 0.215017    |
|  |        |               | ZEB1       | * | 0.00191769  |
|  |        | 0nM vs 100nM  | E-cadherin |   | 0.215452    |
|  |        |               | ZEB1       |   | 0.290918    |
|  |        | 0nM vs 500nM  | E-cadherin |   | 0.255421    |
|  |        |               | ZEB1       |   | 0.158238    |
|  |        | 0nM vs 1000nM | E-cadherin |   | 0.00372432  |
|  |        |               | ZEB1       |   | 0.704464    |
|  | dAza   | 0µM vs 1µM    | E-cadherin |   | 0.16989     |
|  |        |               | ZEB1       |   | 0.983178    |
|  |        | 0µM vs 2.5µM  | E-cadherin | * | 0.000609584 |
|  |        |               | ZEB1       |   | 0.88983     |
|  |        | 0µM vs 5µM    | E-cadherin | * | 0.00305659  |
|  |        |               | ZEB1       |   | 0.729738    |
|  |        | 0µM vs 10µM   | E-cadherin | * | 0.0478358   |
|  |        |               | ZEB1       |   | 0.774152    |
|  |        | 0µM vs 20µM   | E-cadherin | * | 0.00019573  |
|  |        |               | ZEB1       |   | 0.858412    |
|  | cAra   | 0µM vs 1µM    | E-cadherin | * | 0.0119414   |
|  |        |               | ZEB1       |   | 0.348747    |
|  |        | 0µM vs 2.5µM  | E-cadherin |   | 0.582059    |
|  |        |               | ZEB1       |   | 0.0903216   |
|  |        | 0µM vs 5µM    | E-cadherin |   | 0.208189    |
|  |        |               | ZEB1       |   | 0.290854    |
|  |        | 0µM vs 10µM   | E-cadherin |   | 0.291457    |
|  |        |               | ZEB1       |   | 0.462611    |
|  |        | 0µM vs 20µM   | E-cadherin |   | 0.0593593   |
|  |        |               | ZEB1       | * | 0.00429863  |
|  | ad dia | 0µM vs 1µM    | E-cadherin |   | 0.125701    |
|  |        |               | ZEB1       |   | 0.574246    |
|  |        | 0µM vs 2.5µM  | E-cadherin |   | 0.272686    |
|  |        |               | ZEB1       |   | 0.284332    |
|  |        | 0µM vs 5µM    | E-cadherin |   | 0.255639    |
|  |        |               | ZEB1       | * | 0.0373762   |
|  |        | 0µM vs 10µM   | E-cadherin |   | 0.279453    |
|  |        |               | ZEB1       | * | 0.0320593   |
|  |        | 0µM vs 20µM   | E-cadherin |   | 0.403449    |
|  |        |               | ZEB1       |   | 0.128064    |
|  | Dzneq  | 0µM vs 1µM    | E-cadherin |   | 0.122818    |
|  |        |               | ZEB1       | * | 0.0442705   |
|  |        | 0µM vs 2.5µM  | E-cadherin | * | 0.000797316 |
|  |        |               | ZEB1       | * | 0.0201122   |
|  |        | 0µM vs 5µM    | E-cadherin | * | 0.000417205 |
|  |        |               | ZEB1       | * | 0.000365268 |
|  |        | 0µM vs 10µM   | E-cadherin |   | 0.181355    |

|                 |        |               |            |   |             |
|-----------------|--------|---------------|------------|---|-------------|
|                 |        |               | ZEB1       |   | 0.0678065   |
|                 |        | 0μM vs 20μM   | E-cadherin | * | 4.83467E-05 |
|                 |        |               | ZEB1       |   | 0.175484    |
| <b>hPaca1</b>   | TCP    | 0nM vs 25nM   | ZEB1       | * | 0.0369032   |
| <b>to suppl</b> |        |               | E-cad      |   | 0.383551    |
| <b>Fig. 2 E</b> |        |               | miR-200c   |   | 0.450364    |
|                 |        | 0nM vs 50nM   | ZEB1       |   | 0.673638    |
|                 |        |               | E-cad      |   | 0.140315    |
|                 |        |               | miR-200c   |   | 0.488787    |
|                 |        | 0nM vs 100nM  | ZEB1       |   | 0.804466    |
|                 |        |               | E-cad      |   | 0.295539    |
|                 |        |               | miR-200c   |   | 0.45576     |
|                 |        | 0nM vs 500nM  | ZEB1       |   | 0.476616    |
|                 |        |               | E-cad      |   | 0.273778    |
|                 |        |               | miR-200c   |   | 0.343517    |
|                 |        | 0nM vs 1000nM | ZEB1       | * | 0.000866533 |
|                 |        |               | E-cad      |   | 0.206058    |
|                 |        |               | miR-200c   |   | 0.260034    |
|                 | dAza   | 0μM vs 1μM    | ZEB1       | * | 0.00831137  |
|                 |        |               | E-cad      |   | 0.0578366   |
|                 |        |               | miR-200c   | * | 0.0339567   |
|                 |        | 0μM vs 2.5μM  | ZEB1       |   | 0.58519     |
|                 |        |               | E-cad      | * | 0.0301748   |
|                 |        |               | miR-200c   | * | 0.000174277 |
|                 |        | 0μM vs 5μM    | ZEB1       |   | 0.347428    |
|                 |        |               | E-cad      | * | 0.00920103  |
|                 |        |               | miR-200c   |   | 0.251121    |
|                 |        | 0μM vs 10μM   | ZEB1       |   | 0.0993513   |
|                 |        |               | E-cad      | * | 0.0071647   |
|                 |        |               | miR-200c   |   | 0.115504    |
|                 |        | 0μM vs 20μM   | ZEB1       |   | 0.0689343   |
|                 |        |               | E-cad      | * | 0.00417792  |
|                 |        |               | miR-200c   | * | 0.0437705   |
|                 | cAra   | 0μM vs 1μM    | ZEB1       | * | 0.00158253  |
|                 |        |               | E-cad      | * | 0.00257191  |
|                 |        |               | miR-200c   | * | 0.0206921   |
|                 |        | 0μM vs 2.5μM  | ZEB1       | * | 0.0313589   |
|                 |        |               | E-cad      |   | 0.0959373   |
|                 |        |               | miR-200c   |   | 0.152889    |
|                 |        | 0μM vs 5μM    | ZEB1       | * | 0.0383492   |
|                 |        |               | E-cad      |   | 0.263461    |
|                 |        |               | miR-200c   |   | 0.395634    |
|                 |        | 0μM vs 10μM   | ZEB1       | * | 0.0162068   |
|                 |        |               | E-cad      |   | 0.120288    |
|                 |        |               | miR-200c   |   | 0.167271    |
|                 |        | 0μM vs 20μM   | ZEB1       |   | 0.057495    |
|                 |        |               | E-cad      |   | 0.826959    |
|                 |        |               | miR-200c   |   | 0.253215    |
|                 | Ad dia | 0μM vs 1μM    | ZEB1       |   | 0.435266    |
|                 |        |               | E-cad      | * | 0.000104974 |
|                 |        |               | miR-200c   |   | 0.435716    |
|                 |        | 0μM vs 2.5μM  | ZEB1       |   | 0.368703    |

|  |              |              |          |   |             |
|--|--------------|--------------|----------|---|-------------|
|  |              |              | E-cad    |   | 0.1254      |
|  |              |              | miR-200c |   | 0.622071    |
|  |              | 0μM vs 5μM   | ZEB1     | * | 0.00226961  |
|  |              |              | E-cad    | * | 0.0293654   |
|  |              |              | miR-200c |   | 0.392492    |
|  |              | 0μM vs 10μM  | ZEB1     | * | 0.0290271   |
|  |              |              | E-cad    |   | 0.050325    |
|  |              |              | miR-200c |   | 0.336394    |
|  |              | 0μM vs 20μM  | ZEB1     |   | 0.139624    |
|  |              |              | E-cad    | * | 0.0165247   |
|  |              |              | miR-200c |   | 0.46031     |
|  | Dznep        | 0μM vs 1μM   | ZEB1     |   | 0.380529    |
|  |              |              | E-cad    | * | 0.00193867  |
|  |              |              | miR-200c | * | 0.00384111  |
|  |              | 0μM vs 2.5μM | ZEB1     |   | 0.218106    |
|  |              |              | E-cad    | * | 0.018505    |
|  |              |              | miR-200c |   | 0.272617    |
|  |              | 0μM vs 5μM   | ZEB1     |   | 0.0522933   |
|  |              |              | E-cad    | * | 0.0121876   |
|  |              |              | miR-200c |   | 0.0635157   |
|  |              | 0μM vs 10μM  | ZEB1     | * | 0.00371306  |
|  |              |              | E-cad    | * | 0.000500418 |
|  |              |              | miR-200c |   | 0.0584035   |
|  |              | 0μM vs 20μM  | ZEB1     |   | 0.0953649   |
|  |              |              | E-cad    | * | 0.0140657   |
|  |              |              | miR-200c |   | 0.360375    |
|  | Mocetinostat | 0μM vs 0.5μM | ZEB1     | * | 0.0484159   |
|  |              |              | E-cad    | * | 0.00908883  |
|  |              |              | miR-200c |   | 0.937541    |
|  |              |              | miR-203  |   | 0.0527073   |
|  |              | 0μM vs 1μM   | ZEB1     |   | 0.322688    |
|  |              |              | E-cad    | * | 0.03249     |
|  |              |              | miR-200c |   | 0.384994    |
|  |              |              | miR-203  |   | 0.0820926   |
|  |              | 0μM vs 2.5μM | ZEB1     |   | 0.339096    |
|  |              |              | E-cad    | * | 0.000241696 |
|  |              |              | miR-200c |   | 0.805699    |
|  |              |              | miR-203  | * | 0.000603601 |
|  | SAHA         | 0μM vs 0.5μM | ZEB1     |   | 0.542816    |
|  |              |              | E-cad    |   | 0.802273    |
|  |              |              | miR-200c |   | 0.40171     |
|  |              |              | miR-203  |   | 0.83245     |
|  |              | 0μM vs 1μM   | ZEB1     |   | 0.7626      |
|  |              |              | E-cad    |   | 0.71762     |
|  |              |              | miR-200c | * | 0.000401118 |
|  |              |              | miR-203  |   | 0.381133    |
|  |              | 0μM vs 2.5μM | ZEB1     |   | 0.464855    |
|  |              |              | E-cad    |   | 0.278949    |
|  |              |              | miR-200c |   | 0.238344    |
|  |              |              | miR-203  |   | 0.22883     |
|  | Entinostat   | 0μM vs 0.5μM | ZEB1     |   | 0.136156    |
|  |              |              | E-cad    |   | 0.0614782   |
|  |              |              | miR-200c |   | 0.306586    |

|                              |              |              |          |   |             |
|------------------------------|--------------|--------------|----------|---|-------------|
|                              |              |              | miR-203  |   | 0.167243    |
|                              |              | 0µM vs 1µM   | ZEB1     |   | 0.200884    |
|                              |              |              | E-cad    | * | 0.000134667 |
|                              |              |              | miR-200c |   | 0.926642    |
|                              |              |              | miR-203  | * | 0.00678079  |
|                              |              | 0µM vs 2.5µM | ZEB1     |   | 0.083922    |
|                              |              |              | E-cad    | * | 6.68727E-05 |
|                              |              |              | miR-200c |   | 0.582187    |
|                              |              |              | miR-203  | * | 0.00821309  |
|                              | TSA          | 0µM vs 0.5µM | ZEB1     |   | 0.136156    |
|                              |              |              | E-cad    |   | 0.0614782   |
|                              |              |              | miR-200c |   | 0.306586    |
|                              |              |              | miR-203  |   | 0.167243    |
|                              |              | 0µM vs 1µM   | ZEB1     |   | 0.0739032   |
|                              |              |              | E-cad    |   | 0.344408    |
|                              |              |              | miR-200c |   | 0.99663     |
|                              |              |              | miR-203  | * | 0.0074817   |
|                              |              | 0µM vs 2.5µM | ZEB1     | * | 0.00126273  |
|                              |              |              | E-cad    | * | 0.00451344  |
|                              |              |              | miR-200c | * | 0.00377864  |
|                              |              |              | miR-203  | * | 0.012534    |
| <b>MDA-<br/>MB-231</b>       | Mocetinostat | 0µM vs 0.5µM | ZEB1     | * | 0.02774     |
| <b>to suppl<br/>Fig. 2 F</b> |              |              | E-cad    | * | 0.00009     |
|                              |              |              | miR-141  | * | 0.00009     |
|                              |              |              | miR-200a | * | 0.00009     |
|                              |              |              | miR-200b | * | 0.00009     |
|                              |              |              | miR-200c | * | 0.00009     |
|                              |              |              | miR-203  | * | 0.00009     |
|                              |              | 0µM vs 1µM   | ZEB1     | * | 0.00009     |
|                              |              |              | E-cad    | * | 0.00009     |
|                              |              |              | miR-141  |   | 0.38062     |
|                              |              |              | miR-200a |   | 0.05284     |
|                              |              |              | miR-200b |   | 0.05805     |
|                              |              |              | miR-200c |   | 0.17535     |
|                              |              |              | miR-203  | * | 0.02483     |
|                              |              | 0µM vs 2.5µM | ZEB1     | * | 0.00004     |
|                              |              |              | E-cad    | * | 0.00010     |
|                              |              |              | miR-141  |   | 0.90282     |
|                              |              |              | miR-200a |   | 0.07819     |
|                              |              |              | miR-200b | * | 0.00668     |
|                              |              |              | miR-200c |   | 0.43628     |
|                              |              |              | miR-203  | * | 0.00338     |
|                              | SAHA         | 0µM vs 0.5µM | ZEB1     |   | 0.13936     |
|                              |              |              | E-cad    | * | 0.03003     |
|                              |              |              | miR-141  |   | 0.57542     |
|                              |              |              | miR-200a |   | 0.28114     |
|                              |              |              | miR-200b | * | 0.04456     |
|                              |              |              | miR-200c |   | 0.82448     |
|                              |              |              | miR-203  | * | 0.02154     |
|                              |              | 0µM vs 1µM   | ZEB1     |   | 0.14086     |
|                              |              |              | E-cad    |   | 0.60005     |

|  |            |              |          |   |         |
|--|------------|--------------|----------|---|---------|
|  |            |              | miR-141  |   | 0.40008 |
|  |            |              | miR-200a |   | 0.05553 |
|  |            |              | miR-200b |   | 0.09950 |
|  |            |              | miR-200c |   | 0.16721 |
|  |            |              | miR-203  | * | 0.02503 |
|  |            | 0µM vs 2.5µM | ZEB1     |   | 0.84938 |
|  |            |              | E-cad    |   | 0.11953 |
|  |            |              | miR-141  |   | 0.21660 |
|  |            |              | miR-200a |   | 0.07093 |
|  |            |              | miR-200b |   | 0.81734 |
|  |            |              | miR-200c | * | 0.04061 |
|  |            |              | miR-203  |   | 0.57623 |
|  | Entinostat | 0µM vs 0.5µM | ZEB1     |   | 0.07714 |
|  |            |              | E-cad    | * | 0.02583 |
|  |            |              | miR-141  |   | 0.99209 |
|  |            |              | miR-200a |   | 0.12118 |
|  |            |              | miR-200b |   | 0.12717 |
|  |            |              | miR-200c | * | 0.01300 |
|  |            |              | miR-203  |   | 0.05093 |
|  |            | 0µM vs 1µM   | ZEB1     | * | 0.01838 |
|  |            |              | E-cad    | * | 0.00178 |
|  |            |              | miR-141  |   | 0.37090 |
|  |            |              | miR-200a |   | 0.29809 |
|  |            |              | miR-200b |   | 0.12913 |
|  |            |              | miR-200c | * | 0.00079 |
|  |            |              | miR-203  | * | 0.03295 |
|  |            | 0µM vs 2.5µM | ZEB1     | * | 0.00004 |
|  |            |              | E-cad    | * | 0.00232 |
|  |            |              | miR-141  |   | 0.39099 |
|  |            |              | miR-200a |   | 0.18380 |
|  |            |              | miR-200b |   | 0.14264 |
|  |            |              | miR-200c | * | 0.02478 |
|  |            |              | miR-203  | * | 0.01222 |
|  | TSA        | 0µM vs 0.5µM | ZEB1     |   | 0.93799 |
|  |            |              | E-cad    | * | 0.01322 |
|  |            |              | miR-141  |   | 0.47614 |
|  |            |              | miR-200a |   | 0.61435 |
|  |            |              | miR-200b | * | 0.02581 |
|  |            |              | miR-200c | * | 0.04880 |
|  |            |              | miR-203  | * | 0.04788 |
|  |            | 0µM vs 1µM   | ZEB1     |   | 0.17481 |
|  |            |              | E-cad    | * | 0.00390 |
|  |            |              | miR-141  | * | 0.02319 |
|  |            |              | miR-200a |   | 0.83872 |
|  |            |              | miR-200b | * | 0.01996 |
|  |            |              | miR-200c |   | 0.76332 |
|  |            |              | miR-203  |   | 0.05465 |
|  |            | 0µM vs 2.5µM | ZEB1     |   | 0.06895 |
|  |            |              | E-cad    | * | 0.00217 |
|  |            |              | miR-141  |   | 0.23513 |
|  |            |              | miR-200a |   | 0.32887 |
|  |            |              | miR-200b |   | 0.63997 |
|  |            |              | miR-200c |   | 0.62792 |



|  |  |  |         |  |         |
|--|--|--|---------|--|---------|
|  |  |  | miR-203 |  | 0.07623 |
|--|--|--|---------|--|---------|

**Table S2. Clinical data of investigated pancreatic adenocarcinomas vs. adjacent normal pancreatic epithelium.**

| case no. | sex | localisation  | TNM-status | grading | R-classif. | recurrence | ZEB1 staining |
|----------|-----|---------------|------------|---------|------------|------------|---------------|
| 1        | m   | pancreas head | pT4pN0Mx   | 2       | 0          | -          | -             |
| 2        | m   | pancreas head | pT3pN1pMx  | 2       | 0          | -          | -             |
| 3        | f   | pancreas head | pT3pN0pMx  | 2       | 0          | -          | -             |
| 4        | f   | pancreas head | pT3pN1pMx  | 2       | 0          | -          | -             |
| 5        | m   | pancreas head | pT3pN1pMx  | 3       | 0          | local      | +             |
| 6        | f   | pancreas head | pT3pN1pMx  | 3       | 0          | local, met | +             |

**Table S3. Clinical data of investigated pancreatic adenocarcinomas with early vs. no recurrence.**

| case no. | disease recurrence | sex | localisation    | TNM-status | grading | R-classif. | recurrence | ZEB1 staining |
|----------|--------------------|-----|-----------------|------------|---------|------------|------------|---------------|
| 1        | no > 2 years       | m   | pancreas head   | pT4pN0Mx   | 2       | 0          | -          | -             |
| 2        | no > 2 years       | f   | pancreas head   | pT3pN1pMx  | 2       | 0          | -          | -             |
| 3        | no > 2 years       | m   | pancreas head   | pT3pN1Mx   | 2       | 0          | -          | -             |
| 4        | no > 2 years       | m   | pancreas head   | pT3pN1pMx  | 2       | 0          | -          | -             |
| 5        | no > 2 years       | f   | pancreas head   | pT3pN0pMx  | 2       | 0          | -          | -             |
| 6        | no > 2 years       | f   | pancreas corpus | pT3pN1pMx  | 2       | 0          | -          | -             |
| 7        | no > 2 years       | f   | pancreas head   | pT3pN1pMx  | 2       | 0          | -          | -             |
| 8        | no > 2 years       | m   | pancreas head   | pT3pN0pMx  | 2       | 0          | -          | -             |
| 9        | no > 2 years       | f   | pancreas head   | pT3pN1pMx  | 2       | 0          | -          | -             |
| 10       | no > 2 years       | m   | pancreas corpus | pT3pN0pMx  | 2       | 0          | -          | -             |
| 11       | yes <6 months      | m   | pancreas head   | pT3pN1pM0  | 2       | 0          | local      | +             |
| 12       | yes <6 months      | m   | pancreas head   | pT3 pN1Mx  | 2       | 0          | met        | -             |
| 13       | yes <6 months      | f   | pancreas head   | pT3pN1Mx   | 2       | 0          | met        | +             |
| 14       | yes <6 months      | m   | pancreas head   | pT3pN1Mx   | 2       | 0          | local      | +             |
| 15       | yes <6 months      | m   | pancreas head   | pT3pN1pMx  | 3       | 0          | local      | +             |
| 16       | yes <6 months      | f   | pancreas head   | pT3pN1pMx  | 3       | 0          | local      | -             |
| 17       | yes <6 months      | m   | pancreas head   | pT3pN1pMx  | 2       | 0          | local      | -             |
| 18       | yes <6 months      | m   | pancreas head   | pT3pN1pMx  | 3       | 0          | local      | -             |
| 19       | yes <6 months      | f   | pancreas head   | pT3pN1pMx  | 3       | 0          | local, met | +             |
| 20       | yes <6 months      | f   | pancreas head   | pT3pN1pMx  | 3       | 0          | local, met | +             |
| 21       | yes <6 months      | m   | pancreas corpus | pT3pN1pMx  | 2       | 0          | local      | 0             |

**Table S4: Exact p-values for multiple comparisons statistical analyses of MTT-assays**  
(Dunnett' multiple comparisons test, only for graphs reaching statistical significance).

| Fig. 1B, Panc1   |      | p-value  |
|------------------|------|----------|
| Row 1            |      |          |
| ctrl vs. miR-200 | ns   | > 0,9999 |
| ctrl vs. miR-203 | ns   | > 0,9999 |
| Row 2            |      |          |
| ctrl vs. miR-200 | ns   | 0,9728   |
| ctrl vs. miR-203 | ns   | 0,8369   |
| Row 3            |      |          |
| ctrl vs. miR-200 | ns   | 0,1913   |
| ctrl vs. miR-203 | ns   | 0,9749   |
| Row 4            |      |          |
| ctrl vs. miR-200 | *    | 0,0113   |
| ctrl vs. miR-203 | ns   | 0,3490   |
| Row 5            |      |          |
| ctrl vs. miR-200 | ns   | 0,0689   |
| ctrl vs. miR-203 | ns   | 0,3880   |
| Row 6            |      |          |
| ctrl vs. miR-200 | *    | 0,0147   |
| ctrl vs. miR-203 | **** | < 0,0001 |
| Row 7            |      |          |
| ctrl vs. miR-200 | *    | 0,0216   |
| ctrl vs. miR-203 | **** | < 0,0001 |
| Row 8            |      |          |
| ctrl vs. miR-200 | *    | 0,0413   |
| ctrl vs. miR-203 | **** | < 0,0001 |
| Row 9            |      |          |
| ctrl vs. miR-200 | *    | 0,0166   |
| ctrl vs. miR-203 | **** | < 0,0001 |
| Row 10           |      |          |
| ctrl vs. miR-200 | **   | 0,0053   |
| ctrl vs. miR-203 | **** | < 0,0001 |
| Row 11           |      |          |
| ctrl vs. miR-200 | *    | 0,0144   |
| ctrl vs. miR-203 | **** | < 0,0001 |
| Row 12           |      |          |
| ctrl vs. miR-200 | *    | 0,0191   |
| ctrl vs. miR-203 | **** | < 0,0001 |
| Row 13           |      |          |
| ctrl vs. miR-200 | ns   | 0,2613   |
| ctrl vs. miR-203 | **** | < 0,0001 |

| Fig. 1B, hPaca1  |      |          |
|------------------|------|----------|
| ctrl vs. miR-200 | ns   | > 0,9999 |
| ctrl vs. miR-203 | ns   | > 0,9999 |
| Row 2            |      |          |
| ctrl vs. miR-200 | ns   | 0,9372   |
| ctrl vs. miR-203 | ns   | 0,7058   |
| Row 3            |      |          |
| ctrl vs. miR-200 | ns   | 0,5284   |
| ctrl vs. miR-203 | ns   | 0,7673   |
| Row 4            |      |          |
| ctrl vs. miR-200 | ns   | 0,3581   |
| ctrl vs. miR-203 | **** | < 0,0001 |
| Row 5            |      |          |
| ctrl vs. miR-200 | ns   | 0,2267   |
| ctrl vs. miR-203 | **** | < 0,0001 |
| Row 6            |      |          |
| ctrl vs. miR-200 | ns   | 0,0538   |
| ctrl vs. miR-203 | **** | < 0,0001 |
| Row 7            |      |          |
| ctrl vs. miR-200 | ns   | 0,1079   |
| ctrl vs. miR-203 | **** | < 0,0001 |
| Row 8            |      |          |
| ctrl vs. miR-200 | **   | 0,0042   |
| ctrl vs. miR-203 | **** | < 0,0001 |
| Row 9            |      |          |
| ctrl vs. miR-200 | **   | 0,0020   |
| ctrl vs. miR-203 | ***  | 0,0001   |

| Fig. 1D               |    |          |
|-----------------------|----|----------|
| Row 1                 |    |          |
| ctrl vs. anta miR-200 | ns | > 0,9999 |

|                       |    |          |
|-----------------------|----|----------|
| ctrl vs. anta miR-203 | ns | > 0,9999 |
| Row 2                 |    |          |
| ctrl vs. anta miR-200 | ns | 0,2825   |
| ctrl vs. anta miR-203 | ns | 0,4758   |
| Row 3                 |    |          |
| ctrl vs. anta miR-200 | ns | 0,1004   |
| ctrl vs. anta miR-203 | ns | 0,1301   |
| Row 4                 |    |          |
| ctrl vs. anta miR-200 | ** | 0,0013   |
| ctrl vs. anta miR-203 | ** | 0,0013   |

#### Fig. 4B left

|                                 |  |      |          |
|---------------------------------|--|------|----------|
| Row 1                           |  |      |          |
| moc alone vs. 25 nM gemzar +moc |  | *    | 0,0265   |
| moc alone vs. 50 nM gemzar +moc |  | ***  | 0,0004   |
| Row 2                           |  |      |          |
| moc alone vs. 25 nM gemzar +moc |  | **** | < 0,0001 |
| moc alone vs. 50 nM gemzar +moc |  | **** | < 0,0001 |
| Row 3                           |  |      |          |
| moc alone vs. 25 nM gemzar +moc |  | **** | < 0,0001 |
| moc alone vs. 50 nM gemzar +moc |  | **** | < 0,0001 |

#### Fig. 4D right

|                                              |    |   |        |
|----------------------------------------------|----|---|--------|
| Row 1                                        |    |   |        |
| mocetinostat alone vs. mocetinostat + gemzar | ns |   | 0,9976 |
| mocetinostat alone vs. Group C               | ns |   | 0,9976 |
| Row 2                                        |    |   |        |
| mocetinostat alone vs. mocetinostat + gemzar |    | * | 0,0388 |
| mocetinostat alone vs. Group C               |    | * | 0,0388 |
| Row 3                                        |    |   |        |
| mocetinostat alone vs. mocetinostat + gemzar |    | * | 0,0168 |
| mocetinostat alone vs. Group C               |    | * | 0,0168 |

#### Fig. S1A

|                  |      |          |  |
|------------------|------|----------|--|
| Row 1            |      |          |  |
| ctrl vs. miR-200 | ns   | > 0,9999 |  |
| ctrl vs. miR-203 | ns   | > 0,9999 |  |
| Row 2            |      |          |  |
| ctrl vs. miR-200 | ns   | 0,1603   |  |
| ctrl vs. miR-203 | ns   | 0,6808   |  |
| Row 3            |      |          |  |
| ctrl vs. miR-200 | ns   | 0,3736   |  |
| ctrl vs. miR-203 | **   | 0,0050   |  |
| Row 4            |      |          |  |
| ctrl vs. miR-200 | **** | < 0,0001 |  |
| ctrl vs. miR-203 | **** | < 0,0001 |  |
| Row 5            |      |          |  |
| ctrl vs. miR-200 | **** | < 0,0001 |  |
| ctrl vs. miR-203 | **** | < 0,0001 |  |
| Row 6            |      |          |  |
| ctrl vs. miR-200 | **** | < 0,0001 |  |
| ctrl vs. miR-203 | **** | < 0,0001 |  |
| Row 7            |      |          |  |
| ctrl vs. miR-200 | **** | < 0,0001 |  |
| ctrl vs. miR-203 | **** | < 0,0001 |  |
| Row 8            |      |          |  |
| ctrl vs. miR-200 | **** | < 0,0001 |  |
| ctrl vs. miR-203 | **** | < 0,0001 |  |
| Row 9            |      |          |  |
| ctrl vs. miR-200 | ns   | 0,8312   |  |
| ctrl vs. miR-203 | ns   | 0,9373   |  |
| Row 10           |      |          |  |
| ctrl vs. miR-200 | ns   | 0,9858   |  |
| ctrl vs. miR-203 | ns   | 0,5571   |  |

#### Fig. S1B

|                  |    |          |  |
|------------------|----|----------|--|
| Row 1            |    |          |  |
| ctrl vs. miR-200 | ns | > 0,9999 |  |
| ctrl vs. miR-203 | ns | > 0,9999 |  |
| Row 2            |    |          |  |
| ctrl vs. miR-200 | ns | 0,9982   |  |
| ctrl vs. miR-203 | ns | 0,7874   |  |
| Row 3            |    |          |  |
| ctrl vs. miR-200 | ns | 0,9988   |  |
| ctrl vs. miR-203 | ns | 0,7748   |  |
| Row 4            |    |          |  |
| ctrl vs. miR-200 | ns | 0,2247   |  |

|                  |    |        |
|------------------|----|--------|
| ctrl vs. miR-203 | ns | 0,7683 |
| Row 5            |    |        |
| ctrl vs. miR-200 | ns | 0,9328 |
| ctrl vs. miR-203 | ns | 0,7658 |
| Row 6            |    |        |
| ctrl vs. miR-200 | ns | 0,7802 |
| ctrl vs. miR-203 | ns | 0,0645 |
| Row 7            |    |        |
| ctrl vs. miR-200 | ns | 0,7404 |
| ctrl vs. miR-203 | *  | 0,0362 |
| Row 8            |    |        |
| ctrl vs. miR-200 | ns | 0,7213 |
| ctrl vs. miR-203 | *  | 0,0212 |
| Row 9            |    |        |
| ctrl vs. miR-200 | ns | 0,7565 |
| ctrl vs. miR-203 | *  | 0,0117 |
| Row 10           |    |        |
| ctrl vs. miR-200 | ns | 0,5306 |
| ctrl vs. miR-203 | ** | 0,0098 |
