# Supplementary material for: ZEB1-associated drug resistance in cancer cells is reversed by the class I HDAC inhibitor mocetinostat
Source: PubMed Central journal article supplement (PMC4459821; doi:10.15252/emmm.201404396), 2015-04-14

Figure S3A

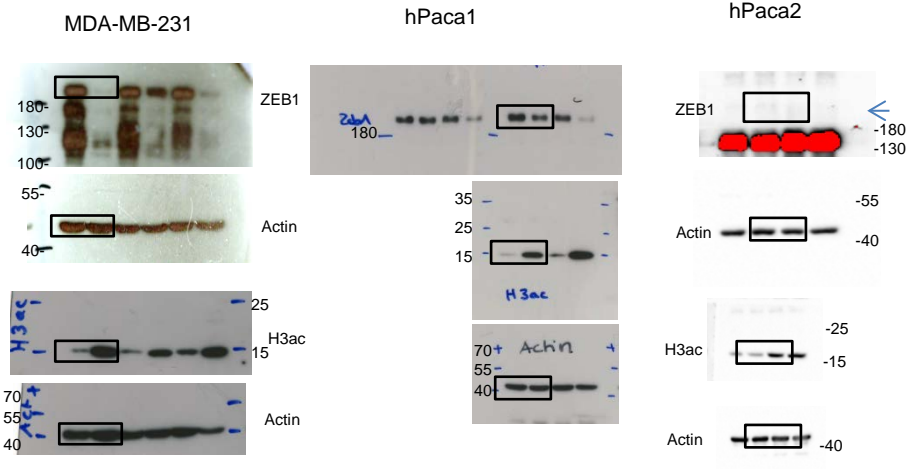

Supplement: emmm0007-0831-sd3.pdf [file emmm0007-0831-sd3.pdf]
