# Supplementary material for: ZEB1-associated drug resistance in cancer cells is reversed by the class I HDAC inhibitor mocetinostat
Source: PubMed Central journal article supplement (PMC4459821; doi:10.15252/emmm.201404396), 2015-04-14

# Figure source data, Fig. 1

## Figure 1 A

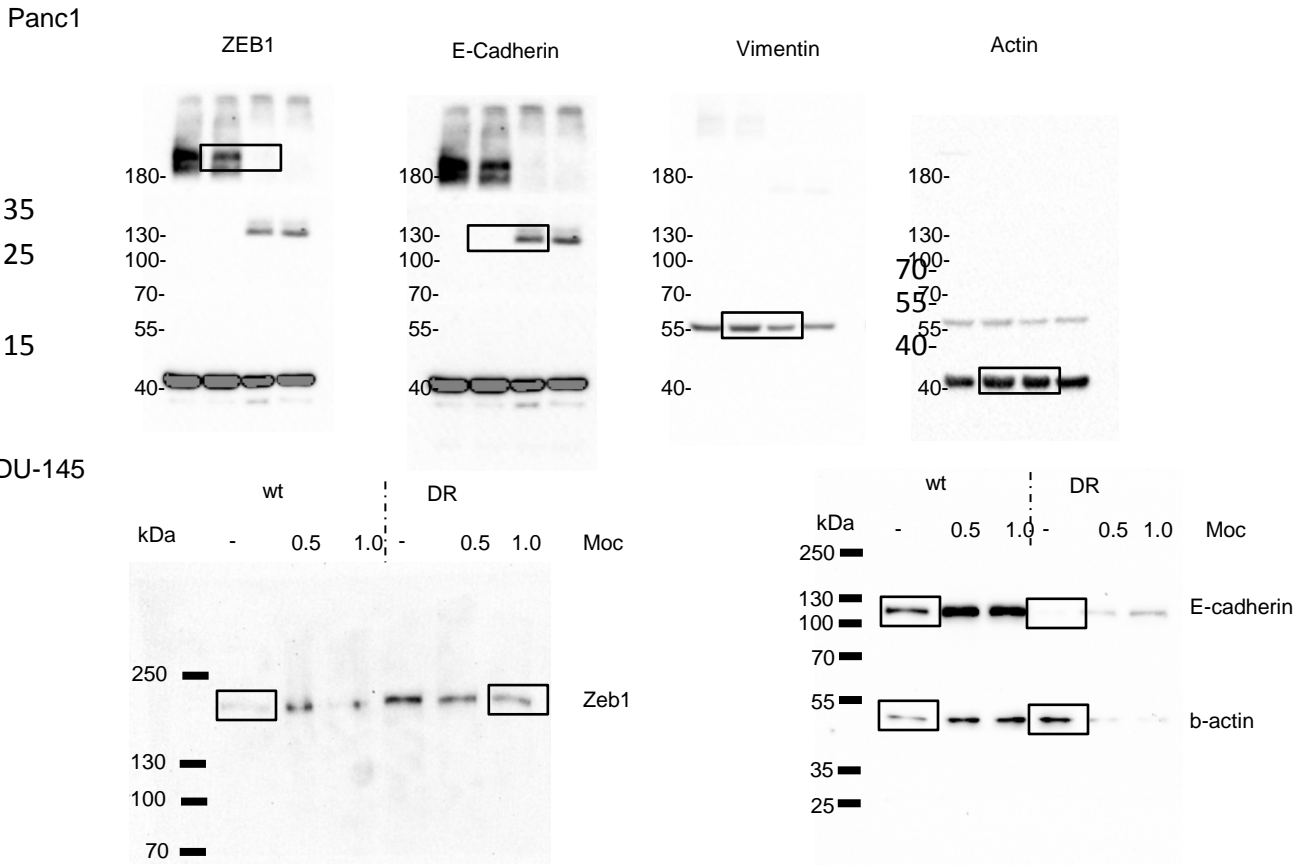

## Figure 1 C

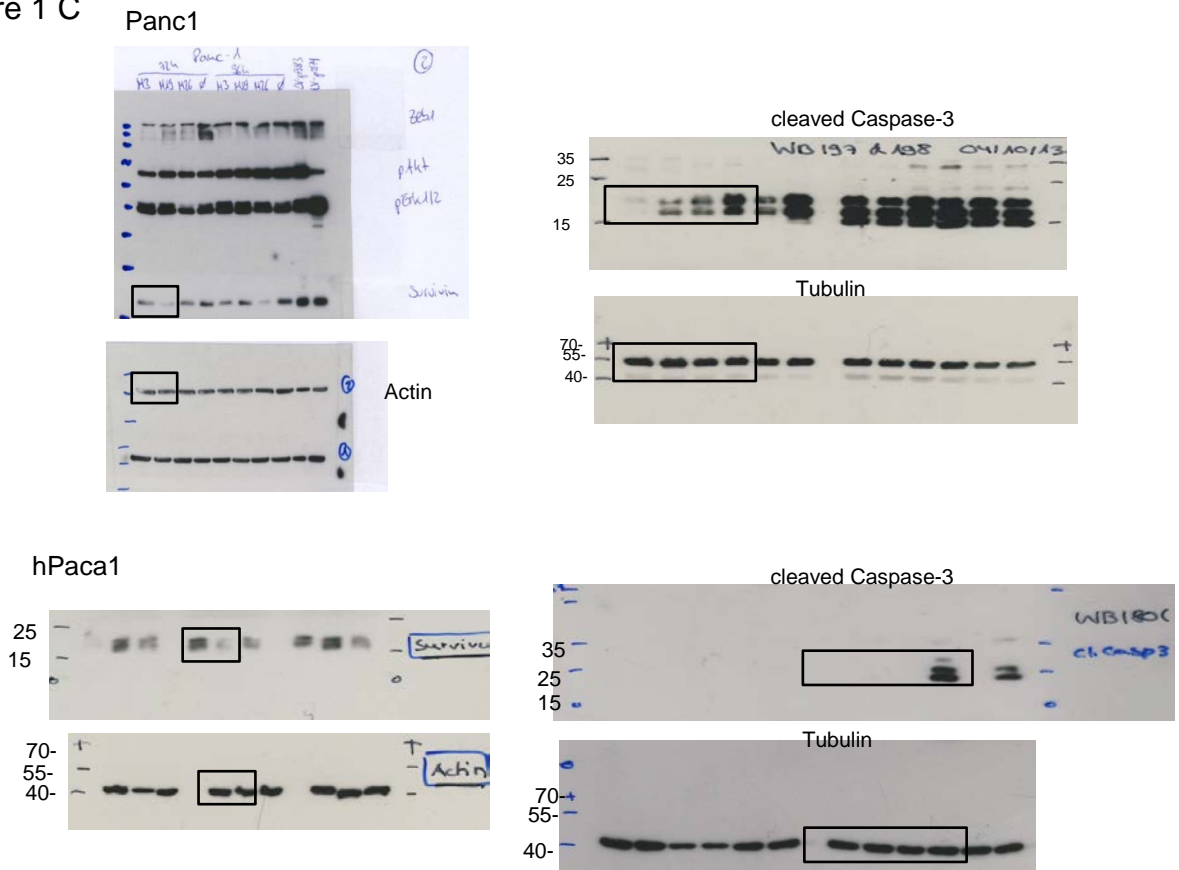

Supplement: emmm0007-0831-sd5.pdf [file emmm0007-0831-sd5.pdf]
